# Supplementary material for: Combining Zinc Biofortification and Native Trichoderma Inoculation Strategies for Subterranean Clover
Source: MDPI journal article supplement (doi:10.3390/su16093730), 2024-04-29
Supplement: s1 [file s1]

## Supplementary material

**Table S1.** Effect of the interaction between the application of the *Trichoderma* spp. Isolates and the biofortification treatment on fiber content, measured through Neutral Detergent Fiber (NDF) Acid Detergent Fiber, Acid Detergent Lignin (ADL) and the content of total ashes. Additionally, the percentage of digestibility of the treated plants is shown.

| Trich. | Biof. | NDF (%)        | ADF (%)          | ADL (%)        | Ashes (%)         | Digestibility (%) |
|--------|-------|----------------|------------------|----------------|-------------------|-------------------|
| T05    | No Zn | 31.9 ± 0.8 de  | 13.0 ± 1.0 ef    | 11.5 ± 0.6 a   | 1.07 ± 0.04 cdef  | 78.8 ± 0.7 ab     |
|        | S     | 30.6 ± 0.7 de  | 13.5 ± 0.6 ef    | 8.0 ± 0.4 cde  | 1.00 ± 0.07 cdefg | 78.4 ± 0.5 ab     |
|        | F     | 38.5 ± 2.9 bcd | 25.7 ± 2.4 ab    | 8.8 ± 0.6 bc   | 1.25 ± 0.03 bcd   | 68.9 ± 1.9 ef     |
|        | SF    | 24.5 ± 1.8 e   | 15.7 ± 1.7 cdef  | 9.0 ± 0.2 bc   | 0.67 ± 0.06 efghi | 76.6 ± 1.3 abcd   |
| T09    | No Zn | 34.2 ± 1.0 cde | 16.3 ± 1.8 bcdef | 8.6 ± 0.1 bcd  | 0.50 ± 0.02 ghij  | 76.2 ± 1.4 abcde  |
|        | S     | 32.1 ± 2.3 de  | 17.9 ± 2.5 bcdef | 8.9 ± 0.4 bc   | 0.79 ± 0.09 defgh | 74.9 ± 1.9 abcde  |
|        | F     | 34.0 ± 3.7 cde | 24.9 ± 3.7 abc   | 6.2 ± 0.3 ef   | 1.20 ± 0.09 cd    | 69.5 ± 2.9 def    |
|        | SF    | 28.9 ± 3.6 de  | 24.1 ± 3.2 abcd  | 7.8 ± 0.5 cde  | 0.91 ± 0.02 cdefg | 70.1 ± 2.5 cdef   |
| T14    | No Zn | 32.0 ± 4.2 de  | 8.4 ± 4.0 f      | 7.7 ± 0.7 cde  | 1.37 ± 0.05 bc    | 82.3 ± 3.1 a      |
|        | S     | 42.4 ± 1.1 abc | 30.9 ± 1.0 a     | 8.6 ± 0.5 bcd  | 1.41 ± 0.04 bc    | 64.9 ± 0.8 f      |
|        | F     | 35.1 ± 6.4 cd  | 21.9 ± 6.2 abcde | 11.1 ± 0.2 a   | 1.20 ± 0.01 cd    | 71.8 ± 4.8 bcdef  |
|        | SF    | 33.1 ± 2.8 cde | 19.9 ± 2.9 bcde  | 6.7 ± 0.3 def  | 1.13 ± 0.07 cde   | 73.4 ± 2.3 bcde   |
| T18    | No Zn | 31.3 ± 8.7 de  | 20.2 ± 7.8 bcde  | 7.6 ± 0.9 cde  | 1.74 ± 0.14 ab    | 73.2 ± 6.1 bcde   |
|        | S     | 35.3 ± 2.5 cd  | 18.5 ± 2.8 bcde  | 8.2 ± 0.6 cd   | 1.08 ± 0.07 cde   | 74.5 ± 2.2 bcde   |
|        | F     | 32.5 ± 2.8 cde | 18.4 ± 3.4 bcde  | 7.3 ± 1.6 cdef | 0.57 ± 0.01 fghij | 74.6 ± 2.7 bcde   |
|        | SF    | 51.7 ± 3.8 a   | 30.2 ± 3.8 a     | 8.7 ± 0.3 bc   | 1.33 ± 0.05 bc    | 65.4 ± 2.9 f      |
| T0     | No Zn | 33.1 ± 3.2 cde | 20.1 ± 3.2 bcde  | 10.5 ± 0.8 ab  | 0.4 ± 0.1 hij     | 73.2 ± 2.5 bcde   |
|        | S     | 32.3 ± 1.2 cde | 14.8 ± 1.1 def   | 3.5 ± 0.5 g    | 0.34 ± 0.03 hij   | 77.4 ± 0.8 abc    |
|        | F     | 48.6 ± 2.5 ab  | 30.4 ± 2.7 a     | 10.4 ± 1.2 ab  | 1.13 ± 0.03 cde   | 65.2 ± 2.1 f      |
|        | SF    | 30.7 ± 1.4 de  | 20.0 ± 1.4 bcde  | 11.0 ± 0.8 a   | 1.92 ± 0.82 a     | 73.3 ± 1.1 bcde   |
| Tc     | No Zn | 35.8 ± 5.4 cd  | 30.9 ± 5.2 a     | 10.2 ± 0.3 ab  | 0.24 ± 0.01 ij    | 64.8 ± 4.0 f      |
|        | S     | 30.7 ± 2.3 de  | 15.9 ± 2.7 cdef  | 5.7 ± 0.1 f    | 0.16 ± 0.01 j     | 76.5 ± 2.1 abcd   |
|        | F     | 31.3 ± 2.2 de  | 20.4 ± 1.9 bcde  | 7.7 ± 1.3 cde  | 1.10 ± 0.02 cde   | 73.1 ± 1.5 bcde   |
|        | SF    | 31.6 ± 5.3 de  | 20.5 ± 4.5 bcde  | 8.7 ± 0.2 bc   | 0.36 ± 0.02 hij   | 73.0 ± 3.5 bcde   |

Values are expressed as mean (n = 5) ± standard error. For each parameter, different letters (if any) indicate significant differences according to LSD (least significant difference) test at  $\alpha = 0.05$ .

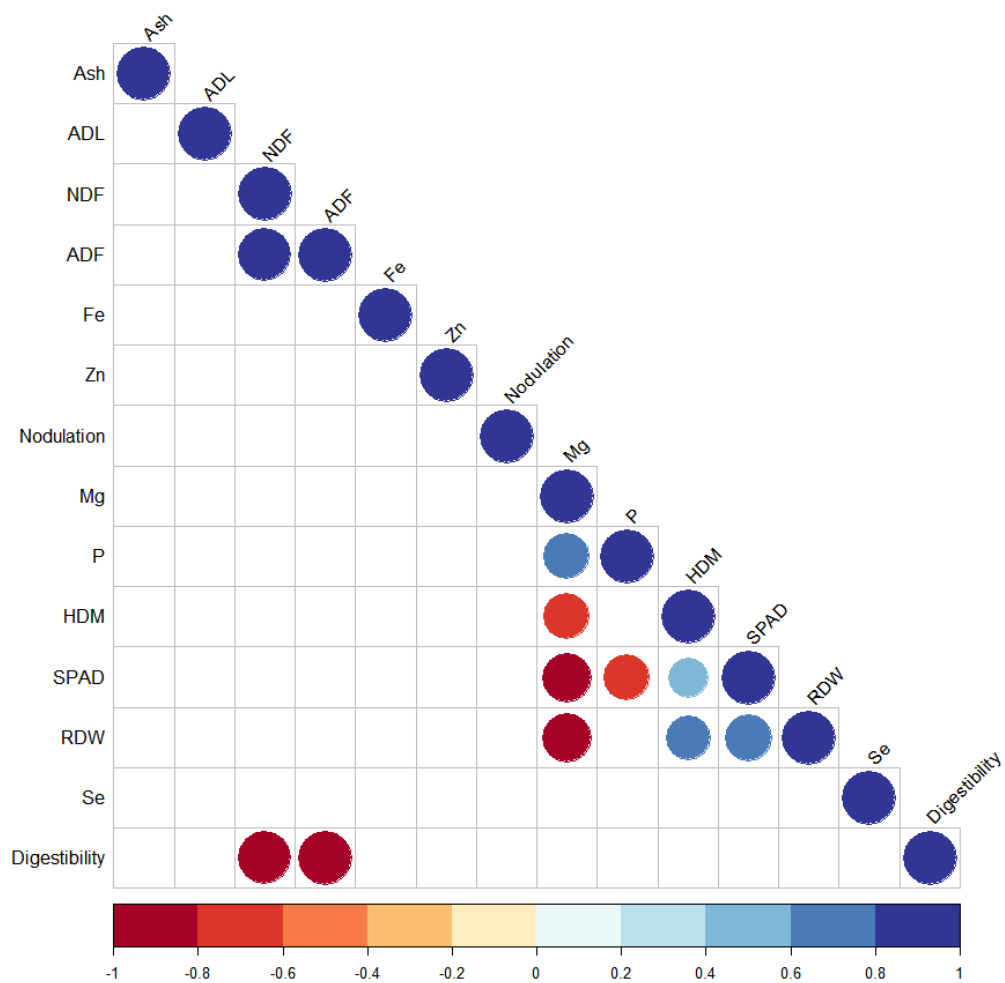

Figure S1. Correlation Matrix showing the significant Pearson correlations ( $p \leq 0.05$ ) between parameters investigated in the study. The robustness of the correlations is depicted using a gradation of colors, with darker colors indicating stronger correlations.
